# Supplementary material for: Temperature-Induced Viral Resistance in Emiliania huxleyi (Prymnesiophyceae)
Source: PLoS One. 2014 Nov 18;9(11):e112134. doi: 10.1371/journal.pone.0112134 (PMC4236053; doi:10.1371/journal.pone.0112134)
Supplement: Table S3 — Virus Incubation and Burst Sizes. Data values for Figures 4, 7, and 8. (XLS) [file pone.0112134.s006.xls]

## Sheet: Sheet1
Virus Absorption
Cells/mL	18V1	18V2	18V3	18V4	21V1	21V2	21V3	21V4
0	1.22894e+06	1.57796e+06	1.16012e+06	1.09621e+06	909415	702953	1.12571e+06	717701
1	1.57796e+06	1.59083e+06	1.19065e+06	1.45998e+06	1.02248e+06	953657	1.04706e+06	521070
2	771774	850426	747195	732448	629217	506323	569943	698038
3	973271	712785	776690	825057	1.13062e+06	471913	816016	1.12079e+06
4	1.54355e+06	1.21419e+06	1.08638e+06	1.04214e+06	801268	973320	830763	1.04214e+06
24	1.41574e+06	1.58287e+06	1.83849e+06	1.19944e+06	1.22894e+06	865173	1.20928e+06	1.05197e+06
48	1.12079e+06	938910	1.21911e+06	1.21419e+06	860258	909415	992983	948741
Viruses/mL
0	9.96424e+06	1.32873e+07	9.42842e+06	8.46493e+06	9.91508e+06	8.32238e+06	9.5464e+06	8.41086e+06
1	8.986e+06	1.07356e+07	8.21104e+06	9.68896e+06	8.28305e+06	7.69808e+06	9.04499e+06	8.45019e+06
2	7.87504e+06	7.0197e+06	6.97054e+06	7.31465e+06	8.80412e+06	9.44317e+06	1.08004e+07	9.50216e+06
3	8.74955e+06	6.41998e+06	7.18192e+06	6.38801e+06	8.51409e+06	7.2999e+06	1.03477e+07	1.12473e+07
4	8.25356e+06	7.74232e+06	7.60959e+06	9.04499e+06	1.25008e+07	1.21026e+07	8.94176e+06	1.18863e+07
24	1.44818e+07	1.48161e+07	1.6104e+07	1.15275e+07	9.86101e+06	8.85328e+06	9.5759e+06	8.78446e+06
48	1.77852e+07	2.52916e+07	6.48192e+07	4.37994e+07	6.6756e+06	7.6735e+06	6.71492e+06	8.31746e+06
Burst Sizes: Sensitive Strains
Temp/Rep	374	392	61/87/10	1516
12V1	417.26	1825.16	482.18
12V2	993.34	12.01	551.52
12V3	460.23	95.06	778.44
15V1	225.68	9.43	1641.64
15V2	416.25	110.02	327.67
15V3	844.67	6.96	366.16
18V1	331.56	7.34	776.84	7.37
18V2	1321.84	26.82	161.4	5.4
18V3	1966.26	0.1	13.9	11.59
21V1	0.1	7.01	0.79	0.07
21V2	0.1	6.8	5.06	0.04
21V3	0.1	0.38	11.97	0.17
Burst Sizes: Viral Incubation
Trt	Rep 1	Rep 2	Rep 3
18C	0.66	0.83	0.15
18V	16.66	3.02	3.54
21V	17.71	36.81	21.3
